## BODY MASS INDEX IN PARENTS AND THEIR ADULT OFFSPRING: A SYSTEMATIC REVIEW AND META-ANALYSIS

Jie Zhang<sup>1</sup>, Gemma Clayton<sup>2,3</sup>, Kim Overvad<sup>1</sup>, Anja Olsen<sup>1,4</sup>, Deborah A Lawlor<sup>2,3</sup>, Christina C Dahm<sup>1</sup>

<sup>1</sup> Department of Public Health, Aarhus University, Aarhus, Denmark;

<sup>2</sup> Population Health Sciences, Bristol Medical School, University of Bristol, Bristol, United Kingdom;

<sup>3</sup> MRC Integrative Epidemiology Unit at the University of Bristol, Bristol, United Kingdom

<sup>4</sup> Danish Cancer Society Research Center, Copenhagen, Denmark

**Correspondence:** Christina C. Dahm (ccd@ph.au.dk)

Department of Public Health, Aarhus University, Bartholins Allé 2, DK-8000 Aarhus C, Denmark

**Key words:** body mass index, intergenerational, adult offspring, systematic review

**Running title:** Body mass index in parents and their adult offspring: a systematic review and meta-analysis

### ACKNOWLEDGEMENT

We thank Mette Lise Lousdal (M.L.L) and Helene Tilma Vistisen (H.T.V) for their support in the literature search and screening.

**FUNDING** JZ's work is supported by Graduate School of Health, Aarhus University. GC's and DAL's contribution to this paper is supported by the European Union's Horizon 2020 research

and innovation programme under grant agreement No 733206 (LifeCycle) and both work in a  
NOTE: This preprint reports new research that has not been certified by peer review and should not be used to guide clinical practice.

unit that receives support from the University of Bristol and the UK Medical Research Council (MC\_UU\_00011/6). DAL's contribution is also supported by the British Heart Foundation CS/16/4/32482).

## **Abbreviations**

BMI body mass index

CI confidence interval

MD mean difference

OR odds ratio

RR risk ratio

ROR ratio of odds ratio

SMD standardized mean difference

## Summary

Obesity may track across generations, due to genetics and family environmental factors, or possibly intrauterine programming. However, many studies only assess associations between maternal body mass index (BMI) on offspring obesity in childhood. To determine whether maternal and paternal associations with offspring BMI differ, and whether associations persist into adulthood, a systematic review and meta-analysis was done. MEDLINE, EMBASE and PubMed (to December 2019) were searched. Observational studies reporting associations between maternal or paternal BMI and adult offspring BMI were included. Offspring BMIs were reported as continuous or categorical measures. 46 studies were included in the systematic review. Meta-analyses were conducted using random effects models. Parental BMI was positively associated with offspring BMI in adulthood. The pooled mother-offspring standardized mean difference (SMD) was 0.23 (95% confidence interval (CI): 0.20, 0.26), and father-offspring SMD was similar: 0.22 (95%CI: 0.19, 0.25) in adjusted models. Maternal and paternal overweight and obesity were associated with higher offspring BMI with similar magnitudes. If these associations are causal, they support interventions targeting all family members, rather than focusing solely on mothers, to maintain a healthy weight.

## 1 1. INTRODUCTION

2 Obesity represents one of the most urgent national and global health challenges because of  
3 its high prevalence and long-term adverse health consequences<sup>1</sup>. Familial resemblance in  
4 obesity is well-recognized<sup>2</sup>. To date, multiple studies have explored parental-offspring body  
5 mass index (BMI) associations and linked maternal or paternal adiposity with unfavorable  
6 offspring body composition and related morbidity (e.g. diabetes, cardiovascular and metabolic  
7 diseases)<sup>3,4</sup>.

8 However, the causes of the intergenerational association are unclear. Genetic  
9 predisposition, family socioeconomic status, and lifestyle factors (e.g., diet, physical activity)  
10 are important contributors to risk of offspring adiposity<sup>5,6</sup>. In addition to the above factors,  
11 mothers with greater BMI during pregnancy might increase the risk of obesity in the offspring  
12 via the fetal environment according to the 'fetal overnutrition' hypothesis<sup>7,8</sup>. The hypothesis  
13 suggests that maternal nutritional imbalance during gestation can alter metabolic processes,  
14 including the hypothalamic response to leptin and subsequent regulation of appetite and  
15 pancreatic beta-cell physiology, and have a persistent effect on offspring adiposity<sup>9</sup>. This  
16 hypothesis is supported by some animal studies<sup>10,11</sup>, yet the evidence is mixed in human  
17 studies<sup>12,13</sup>. However, novel evidence from Mendelian randomization studies which use  
18 maternal genetic variants adjusted for offspring genetic variants as unconfounded  
19 instrumental variables for an intrauterine exposure casts doubt on the causal effect of maternal  
20 pregnancy adiposity<sup>14,15</sup>. Furthermore, 'negative control' studies, which used paternal  
21 adiposity as a control and compared mother-offspring and father-offspring BMI associations  
22 suggest that maternal associations may be explained by family confounding<sup>6,16</sup>. If there is a  
23 causal *in-utero* effect, the association between parental-offspring BMI should be stronger in  
24 the maternal line than in the paternal line<sup>17</sup>. There is also growing interest to investigate  
25 whether any such association differs between daughters and sons. Comparison between the  
26 same-sex (mother-daughter, father-son) versus cross-sex (mother-son, father-daughter)  
27 transmission would provide more insight into understanding the mechanisms underlying the  
28 association. If a stronger same-sex association is observed, it might imply that shared

29 environment rather than genes is the driver because selective mother-daughter and father-  
30 son gene transmission is not a common Mendelian trait<sup>18</sup>. However, no consistent patterns  
31 have been identified so far, making it difficult to draw conclusions. While previous systematic  
32 reviews have assessed associations between parental BMI and BMI of the offspring during  
33 childhood<sup>6,19</sup>, few have investigated sex-specific parental-offspring BMI associations, and very  
34 little is known about the strength of associations with offspring in adulthood. We undertook a  
35 systematic review and meta-analyses to quantify the strengths of associations between  
36 parental BMI and adult offspring obesity, including separately by maternal and paternal lines.  
37 The objectives of the present study were 3-fold: 1) to synthesize data from studies published  
38 from 1980 to 2020, thus investigating whether parental BMI is persistently associated with  
39 offspring adiposity in adulthood; 2) to explore the difference in maternal or paternal  
40 associations with adult offspring BMI and compare the associations for maternal and paternal  
41 lines; 3) to assess same-sex (mother-daughter, father-son) and cross-sex (mother-son, father-  
42 daughter) parent-offspring BMI associations.

## 43 **2. METHODS**

44 The meta-analysis was performed following the Meta-analysis of Observational Studies in  
45 Epidemiology (MOOSE) recommendation<sup>20</sup>. The study was registered in PROSPERO  
46 (CRD42020159281), an international database of prospectively registered systematic reviews.

### 47 **2.1 Search strategy**

48 We carried out a systematic literature search of PubMed, Embase, Web of Science,  
49 COCHRANE, and Google Scholar using predefined search terms ([Appendix](#)). Searches were  
50 restricted to human studies published in English, full-text articles published after 1980. The  
51 reference lists of all studies that met the inclusion criteria and all related systematic reviews  
52 were searched by J.Z., H.T.V, and C.C.D. Citation searches for all studies that met the  
53 inclusion criteria and all related systematic reviews were performed using Google Scholar  
54 Citations. Authors of included studies were contacted for additional data when required for  
55 inclusion in the meta-analyses. Database searches were completed in August 2019 and  
56 updated in July 2020.

## 57 **2.2 Study eligibility criteria**

### 58 *2.2.1 Inclusion criteria*

59 Inclusion criteria were peer-reviewed studies reporting both the exposure variable (maternal  
60 BMI or paternal BMI, overweight, or obesity) and the outcome variable (offspring BMI,  
61 overweight, or obesity) among offspring aged 18 years or older. Exposure and outcome  
62 variables could be either continuous or categorical. To be included, studies had to have been  
63 published as full articles written in English, and express the findings as correlation or  
64 regression coefficients with 95% confidence intervals (CIs), or odds ratios (OR) or risk ratios  
65 (RR) with 95% CI. Studies reporting offspring BMI in late adolescence/early adulthood  
66 (reporting any offspring aged 18 years or older) were included. We included the first two  
67 generations, that is grandparents and parents, in a three-generational cohort study where the  
68 youngest generation was less than 18 years of age. Continuous BMI was selected as the main  
69 measurement of adiposity in meta-analyses. Where studies were based on the same cohort  
70 (e.g 1958 British birth cohort) and the same participants, we chose the study with the larger  
71 study population or older age group.

### 72 *2.2.2 Study selection*

73 Three assessors (J.Z., H.T.V, M.L.L.) independently reviewed the titles and abstracts of all  
74 identified citations using Covidence online software (Covidence.org)<sup>21</sup>. Each full-text article  
75 was independently evaluated by three reviewers (J.Z., C.C.D, H.T.V). Disagreements were  
76 settled by discussion and consensus, with the third reviewer (C.C.D) available as an  
77 adjudicator.

### 78 *2.2.3 Data extraction*

79 A piloted data collection form was used by three reviewers (J.Z., C.C.D., H.T.V.) to  
80 independently extract the following data from full-text articles: study design, years of study,  
81 study origin (country), study setting, sample size, assessment methods of weight and height  
82 information, when BMI was ascertained, whether maternal BMI pertained to pre-pregnancy,  
83 and reported measures of association. We included information available from the publications.  
84 Inconsistencies were checked and resolved through the consensus process described earlier.

## 85 **2.3 Data synthesis**

### 86 *2.3.1 Continuous outcome*

87 We extracted correlation coefficients ( $r$ ) or regression coefficients (mean difference (MD) or  
88 standardized mean difference (SMD)) for continuous outcomes. As studies varied in reporting  
89 associations between different familial groupings, we summarized three levels of family  
90 relationship groups: i) sex-specific at parental level and offspring level: mother-daughter,  
91 mother-son, father-daughter, and father-son; (ii) sex-specific at parental level: mother-  
92 offspring and father-offspring. When measures of association were reported by offspring sex  
93 at parental and offspring level, we used methods proposed by Borenstein et al.<sup>22</sup> to combine  
94 father-offspring (or mother-offspring) from sex-specific associations (father-daughter and  
95 father-son, or mother-daughter and mother-son) and assumed varying correlations (ranging  
96 from 0-0.3) depending on the study design and analysis of the study to account for  
97 dependency. For example, we assumed a correlation of 0.3 where multilevel models had  
98 accounted for the structure of the data whilst we assumed a correlation of 0 in models with  
99 e.g. fathers with only one child. Inverse variance-weighted random-effects modelling was  
100 conducted to pool the sex-specific associations to either father-offspring or mother-offspring.  
101 Finally, random-effect meta-analysis was applied to synthesize the overall parental-offspring  
102 association since it accounts for both random variability and the variability in effects among  
103 the studies.

104 For data from regression models (where offspring BMI could be in  $\text{kg/m}^2$  or SD units), we  
105 separately extracted regression coefficients that were (i) MD per  $\text{kg/m}^2$  difference in parental  
106 BMI (ii) SMD per SD difference in parental BMI<sup>23-26</sup>. We then transformed studies reporting  
107 MD per  $\text{kg/m}^2$  difference in parental BMI to SD units, so that (i) and (ii) could be combined to  
108 increase power. Regression coefficients from multilevel models were treated as standard  
109 regression models. For studies reporting correlation coefficients ( $r$ ), data were transformed  
110 with Fisher's Z scale, and via the inverse Fisher's Z transformation to  $r$ . The correlation  
111 coefficients were combined with unadjusted regression coefficients for the unadjusted data

112 synthesis. The unadjusted and adjusted data (minimally adjusted for offspring's age and sex)  
113 were synthesized separately.

114 Furthermore, we tested whether there were differences between mother-offspring and father-  
115 offspring associations. Differences in SMD or MD were calculated for continuous outcomes.  
116 Forest plots were constructed to display the individual and aggregate measures of association  
117 and their corresponding 95% CIs, in addition to tables presenting the aggregate results. We  
118 calculated the  $I^2$  value to measure heterogeneity, which represents the observed percentage  
119 of total variation across studies due to heterogeneity rather than chance.

### 120 *2.3.2 Categorical outcome*

121 ORs and RRs and either their standard errors or 95%CI were directly extracted from study  
122 results. Because few studies reported obesity prevalence of more than 20% or reported RRs,  
123 ORs and RRs were summarized together<sup>27</sup>. Studies varied in reporting parental or offspring  
124 weight status using different criteria, different reference groups (e.g., normal weight mother,  
125 normal weight father, both normal weight parents), or varied in stratifying sex-specific  
126 associations (e.g. mother/father-daughter, mother/father-son association, parent-  
127 daughter/parent-son association, or mother/father-offspring, or parent-offspring), precluding  
128 synthesizing results to a meaningful single summary OR. We therefore presented forest plots  
129 showing individual study results without pooling ORs.

### 130 **2.4 Subgroup analyses**

131 The following subgroup analyses were specified a priori for the primary analysis, where data  
132 were available: (i) BMI assessment method: measured versus self-reported; (ii) study design:  
133 cross-sectional study versus longitudinal study; (iii) maternal BMI measured before pregnancy  
134 versus after pregnancy; (iv) offspring age: early adulthood (younger than 30 years), mid-  
135 adulthood (30-40years), and later adulthood (older than 40 years).

### 136 **2.5 Quality assessment**

137 Quality assessment was done by two reviewers (J.Z. and C.C.D) using a Newcastle-Ottawa  
138 scale ([Appendix](#)). The Newcastle-Ottawa scale evaluated the study design,  
139 representativeness of the exposed cohort, selection of the non-exposed cohort, ascertainment



140 of exposure, comparability of cohorts on the basis of the design or analysis, assessment of  
141 offspring BMI, whether all adult participants in the analysis were the target age of the research  
142 question, and the adequacy of follow up of cohorts. We also considered how missing data  
143 were handled, whether studies included only biological parents and children (non-paternity),  
144 and adjustment for key confounders in the quality assessment. Studies were awarded one  
145 point per fulfilled criteria.

## 146 **2.6 Post hoc analyses and publication bias**

147 We conducted post hoc analyses by excluding 7 studies<sup>26,28-33</sup> (15% of studies and 5% of  
148 participants) that measured offspring BMI at 15–25 years or took out 3 studies<sup>25,29,34</sup> with low  
149 quality scores. To evaluate the potential effect of unpublished studies on our main findings  
150 (due to asymmetry or publication bias), we produced funnel plots and conducted Egger's  
151 regression<sup>35</sup>.

152 All analyses were conducted using the metan command in Stata BE version 17<sup>36</sup> (StataCorp,  
153 College Station, TX, USA).

## 154 **3. RESULTS**

### 155 **3.1 Descriptive statistics**

156 The searches identified 32,689 studies, of which 90 studies met the abstract inclusion criteria.  
157 Of the studies that met the initial abstract screening, 44 studies were excluded from the review,  
158 because: study subjects were not adult offspring (n=22), wrong exposure or outcome (n=10),  
159 adiposity was not assessed by BMI (n=3), exposure or outcome were BMI change (n=4),  
160 articles were not in English (n=1), wrong comparator (n=1), wrong study design (n=1), same  
161 cohort (n=1), or conference abstract (n=1). This resulted in 46 publications in the review  
162 (*Figure S1*). Of these studies, 26 were cohort studies, and 20 were cross-sectional studies.  
163 Study populations were from Australia, Asia, Europe, North and South America. Most of the  
164 studies included parent-offspring pairs and trios, with sample size ranging from 32 mother–  
165 daughter dyads<sup>29</sup> to 36,528 father-mother-offspring trios<sup>37</sup>. Two studies used a three-  
166 generation cohort<sup>38,39</sup>. Parental and offspring BMIs were examined at different life stages  
167 across studies. Some studies focused on parental BMI at an early age<sup>24,30,40-43</sup>, while other

168 studies collected parental anthropometric information in parallel with that of the adult offspring,  
169 so that parents were in middle or late adulthood<sup>23,25,31,32,44-46</sup>. The information extracted from  
170 each study is presented in *Table S1*.

171 Various statistical methods were employed to analyze the relationship between parental BMI  
172 and adult offspring BMI. These included correlation coefficient methods, linear regression  
173 models, logistic or multinomial models, and multilevel models. Most linear regression studies  
174 adjusted for family socioeconomic factors, maternal age, smoking, drinking, and other  
175 important confounders. The majority of studies found positive associations between parents  
176 and their adult offspring BMI, while four studies reported null associations<sup>25,34,38,46</sup>. Several  
177 studies investigated sex-specific associations and compared the same-sex (mother-daughter,  
178 or father-son) or cross-sex (mother-son, father-daughter) relationships within the same  
179 population<sup>18,23,24,47,48</sup>. Conclusions regarding the findings for these sex-specific results varied  
180 between the studies. Detailed information is found in *Table S2, S3, and S4*.

### 181 **3.2 Standardized Mean Difference (SMD) for continuous measures of BMI**

182 Associations of continuous measures of maternal and/or paternal BMI with offspring BMI were  
183 reported in 35 studies. These studies used different BMI units and not all adjusted for  
184 confounders. We pooled results separately for: (i) confounder-adjusted SMD (n = 15 studies);  
185 (ii) unadjusted (for any covariates) SMD (n = 21) and (iii) confounder-adjusted associations  
186 with parental and offspring BMI in 1 kg/m<sup>2</sup> units (n= 9).

187 Across all of these studies, results were consistent with similar positive associations for  
188 mother-offspring and father-offspring. For example, the pooled analyses showed mother-  
189 offspring SMD was 0.23 (95%CI: 0.20, 0.26 per SD greater maternal BMI), and the father-  
190 offspring was 0.22 (95%CI: 0.19, 0.25 per SD greater paternal BMI) in adjusted models (*Figure*  
191 *1*). The equivalent unadjusted SMD results were 0.24 (95%CI: 0.21, 0.28) for mother-offspring  
192 and 0.21(95% CI: 0.18, 0.25) for father-offspring (*Figure S2*, with additional result in *Table S5*).  
193 There was evidence of between study heterogeneity in both analyses ( $I^2=79%$  for mother-  
194 offspring,  $I^2=68%$  for father-offspring). The synthesized sex-specific adjusted SMDs

195 revealed similar positive associations for mother-daughter, mother-son, father-daughter, and  
196 father-son (*Figure 2, Table S5*).

197 Pooled results from 15 studies of the mean difference in offspring BMI ( $\text{kg/m}^2$ ) per 1  $\text{kg/m}^2$   
198 parental BMI were consistent with those for the SMD. There were also high levels of between  
199 study heterogeneity (*Figure S3a, Figure S3b and Table S6*).

200 We further compared the strength of associations between maternal and paternal BMI and  
201 offspring BMI by calculating the difference in SMD. There was no strong evidence for  
202 differences by offspring gender for either maternal or paternal associations (difference in  
203  $\text{SMD}=0.01$ , 95%CI: -0.02, 0.05; *Figure 3*). Similar approaches were applied to unadjusted  
204 SMD and MD, and results remained similar (*Figure S4, Figure S5 and Tables S7 to S9*).

205 There were 4 studies that could not be included in the meta-analyses<sup>33,37,49,50</sup>. The reported  
206 findings were consistent with the meta-analysed studies. For detailed descriptions, see *Table*  
207 *S10*.

### 208 **3.3 Subgroup and post hoc analyses**

209 There was evidence that associations were weaker when parental BMI was based on parental  
210 self-reported weight and height rather than with clinical or research measures (for example  
211  $\text{SMD}=0.21$  (95%CI: 0.15, 0.27 for mother-offspring,  $p=0.000$  and  $\text{SMD}=0.26$ , 95%CI:  
212 0.23,0.30,  $p=0.006$ , respectively; (exact  $p<0.1$  for heterogeneity between groups, *Figure S6,*  
213 *Table S11*). The association was higher in cross-sectional studies compared to cohort studies  
214 for father-offspring associations but not for mother-offspring associations (*Figure S7a, Table*  
215 *S12*). Pooled results were very similar comparing studies where maternal BMI ascertainment  
216 was before/ in early pregnancy or after pregnancy (*Figure S8, Table S13*), similarly results  
217 were consistent between studies in which children younger than 30 years and those who were  
218 older than 40 years (*Figure S9a, Figure S9b, and Table S14*).

219 Post hoc analysis were performed to investigate the moderate-to-high degree of between-  
220 study heterogeneity, including taking out studies with a small proportion of offspring younger  
221 than 18 years (*Table S15*) or with low quality (*Table S16*). The results remained similar to the  
222 main analyses.

### 223 **3.4 Secondary outcome - ORs**

224 18 studies investigated the association between parental BMI status and offspring overweight  
225 or obesity and were included. 11 of the studies<sup>18,25,31,33,42,47,51-64</sup> used World Health  
226 Organization<sup>65</sup> categories to define overweight (BMI 25.0–29.9 kg/m<sup>2</sup>) and obese status (BMI  
227 ≥30 kg/m<sup>2</sup>); the remaining studies used different thresholds based on the study population  
228 distribution.

229 As noted in the methods we did not pool results from these studies. Most studies found that  
230 adult offspring of overweight or obese parents (either mother or father, or both) were more  
231 likely to be overweight or obese themselves, compared to those with normal-weight parents,  
232 though magnitudes of association varied ranging from 1.1 (95%CI: 0.8, 1.6)<sup>53</sup> to 11.8 (95%CI:  
233 7.7, 18.0)<sup>18</sup> (see *Figures S10 to S12*).

234 Only one study found little evidence of an association between mother-offspring or father-  
235 offspring weight status<sup>56</sup>. ORs were generally higher when both parents were overweight or  
236 obese compared to results using where only one parent was overweight or obese, and there  
237 was evidence of a dose response with stronger magnitudes of association for parental obesity  
238 than overweight. 4 studies examined the association of parental BMI as a continuum with ORs  
239 for offspring overweight or obesity, with results for these showing higher odds of offspring  
240 overweight and obesity with higher parental mean BMI<sup>31,62,63,66</sup>.

### 241 **3.5 Study quality and risk of bias**

242 The majority of the studies were considered of good quality (scored above 3), with 4 studies  
243 scoring 7, and 3 studies below 2. 11 studies did not have a representative sample of the target  
244 population, the exposure or outcome were self-reported or without description in 15 studies,  
245 and confounding factors were not considered in the analyses in 10 studies. 13 cross-sectional  
246 studies did not score a point for adequacy of follow up of the cohort due to the nature of the  
247 study design; 17 cohort studies had a follow-up of <80% and did not provide any description  
248 of loss to follow-up. All studies were followed-up long enough for outcomes to occur (average  
249 offspring age was above 18 years old). Sensitivity analyses taking out the 3 studies of poor

250 quality (score below 2) showed slightly higher SMD and lower I<sup>2</sup> in the adjusted models (*Table*  
251 *S17*).

### 252 **3.6 Funnel plot asymmetry**

253 The funnel plot and Egger's test shows no strong evidence of funnel asymmetry suggesting  
254 there was little evidence of publication bias (*Figure S13*).

## 255 **4. DISCUSSION**

256 In this systematic review, we found positive associations between parental BMI and their  
257 offspring BMI in adulthood, assessed using several different measures of association.  
258 Directions and magnitudes of associations were similar for both parents and when assessed  
259 separately in daughters and sons. They were also similar in subgroups of studies that differed  
260 in age at which offspring weight and height were ascertained and timing of maternal BMI in  
261 relation to pregnancy. Most studies were considered good quality, with only few scoring poorly,  
262 and we observed that results in studies with BMI (parental and/or offspring) based on self-  
263 reported rather than measured weight and height were weaker. The findings extend a previous  
264 systematic review on the intergenerational transmission of parental and offspring adiposity in  
265 childhood<sup>6,19</sup> and demonstrate that the association persists into adulthood. The magnitude of  
266 association across the BMI distribution was relatively weak. For example, the pooled  
267 SMD=0.23 per 1SD higher in maternal BMI is equivalent to a correlation coefficient of 0.23.  
268 On the other hand, this correlation could be important at a population level.

269 Most of the meta-analysed studies measured parental BMI concurrently with offspring  
270 BMI, and it is conceivable that any intrauterine effects might be diluted with increasing age.  
271 However, our results were similar for studies that measured parental BMI before the index  
272 pregnancy. That we see similar magnitudes of associations for mothers and fathers, is  
273 consistent with previous parental negative control and Mendelian randomization studies<sup>15,16,67-</sup>  
274 <sup>71</sup>, which suggest that intrauterine mechanisms are not key to cross-generational associations.  
275 The comparison of same-sex versus cross-sex association also did not reveal significant sex  
276 differences in the associations. Our findings are consistent with both parents contributing to  
277 an 'obesogenic' family environment, but are also compatible with the inheritance from either

278 parent, or both, of genetic traits predisposing to adiposity<sup>72</sup>. Thus, these findings emphasize  
279 the need to target all family members for obesity prevention.

280 Between-study heterogeneity was moderate-to-high for some of the pooled results. We  
281 conducted a series of subgroup analyses to explore the sources of heterogeneity, but found  
282 consistent results between subgroups for all of these, except whether BMI was based on self-  
283 reported or measured weight and height. Results were consistent between studies that did not  
284 adjust for any confounders and those adjusting for some confounders (most of which adjusted  
285 for what we consider to be key confounders). Thus differences in confounder adjustments are  
286 unlikely to explain between study heterogeneity and we are unable to determine the cause of  
287 between study heterogeneity. 6 studies adjusted for early life variables such as birth weight or  
288 gestational weight gain<sup>40,43,59,61,73,74</sup>, which are potential mediators on the causal pathway  
289 between parental and offspring BMI, rather than confounders. Therefore, we used results from  
290 models that did not adjust for birthweight or gestational weight gain in the meta-analyses.

291 Key strengths of our review include the focus on offspring adult BMI, carefully considering  
292 which studies are appropriate to meta-analyses, and undertaking relevant subgroup analyses.  
293 We have investigated sex-specific associations and compared associations of maternal-  
294 offspring to paternal-offspring BMI associations to explore the potential etiology of BMI  
295 intergenerational associations.

296 We acknowledge the limitations of the meta-analyses. Firstly, whilst our focus was on  
297 offspring adult (18 years or older) BMI, 7 studies<sup>26,28-33</sup> (corresponding to 15% of studies and  
298 5% of participants) measuring offspring BMI at 15–25 years were included in the systematic  
299 review. However, meta-analysis results were not changed with removal of these studies. We  
300 have focused on adult BMI and it is possible that results would be different for other measures  
301 of adiposity, such as waist circumference or fat mass. However, the strong correlations  
302 between BMI and these measurements, together with similar Mendelian randomization results  
303 for maternal BMI with offspring BMI and fat mass, makes this unlikely<sup>75</sup>. The small number of  
304 studies reporting all combinations of mother, father, daughter and son associations limited our  
305 ability to assess any dose-response relationships between within these different groups.

306 **Conclusions**

307 This systematic review and meta-analysis of observational studies indicates that the  
308 intergenerational associations between parental and offspring obesity persisted into adulthood.  
309 We found there was no strong evidence of differences between maternal and paternal lines,  
310 which together with Mendelian randomization and negative control studies<sup>6,16</sup> mostly in  
311 younger aged offspring, suggest that intrauterine effects related to higher maternal BMI are  
312 not a major cause of higher offspring adiposity.

313

314

315 **CONFLICT OF INTEREST**

316 DAL has received support from Roche Diagnostics and Medtronic Ltd for research unrelated  
317 to this paper; other authors declare no conflicts of interest.

318

319

320 **AUTHOR CONTRIBUTIONS**

321 JZ and CCD had the original idea for the paper and designed the study. JZ, GC, KO, AO, DAL  
322 and CCD contributed to the analysis plan. The bibliographic search and data extraction was  
323 carried out by JZ, HTV, MLL, and CCD. The methods and statistical analysis were performed  
324 by JZ and GC. The interpretation of results and writing and final editing was done by all authors.  
325 All authors reviewed and approved the manuscript.

326

327

328

329

330



## 331 Reference

- 332 1. McPherson K. Reducing the global prevalence of overweight and obesity. *The Lancet*.  
333 2014;384(9945):728-730.
- 334 2. Katzmarzyk PT, Perusse L, Rao D, Bouchard C. Familial risk of obesity and central adipose tissue  
335 distribution in the general Canadian population. *American journal of epidemiology*.  
336 1999;149(10):933-942.
- 337 3. Razaz N, Villamor E, Muraca GM, Bonamy A-KE, Cnattingius S. Maternal obesity and risk of  
338 cardiovascular diseases in offspring: a population-based cohort and sibling-controlled study.  
339 *The Lancet Diabetes & Endocrinology*. 2020;8(7):572-581.
- 340 4. Godfrey KM, Reynolds RM, Prescott SL, et al. Influence of maternal obesity on the long-term  
341 health of offspring. *The lancet Diabetes & endocrinology*. 2017;5(1):53-64.
- 342 5. Bond TA, Karhunen V, Wielscher M, et al. Exploring the role of genetic confounding in the  
343 association between maternal and offspring body mass index: evidence from three birth  
344 cohorts. *International journal of epidemiology*. 2020;49(1):233-243.
- 345 6. Patro B, Liber A, Zalewski B, Poston L, Szajewska H, Koletzko B. Maternal and paternal body  
346 mass index and offspring obesity: a systematic review. *Annals of Nutrition and Metabolism*.  
347 2013;63(1-2):32-41.
- 348 7. Desai M, Ross MG. Fetal programming of adipose tissue: effects of intrauterine growth  
349 restriction and maternal obesity/high-fat diet. Paper presented at: Seminars in reproductive  
350 medicine2011.
- 351 8. Winter P, Osmond C, Margetts B, Simmonds S. Weight in Infancy and Death from Ischemic  
352 Heart Disease'. *Lancet*. 1989;2:577-580.
- 353 9. Marciniak A, Patro-Małyśza J, Kimber-Trojnar Ź, Marciniak B, Oleszczuk J, Leszczyńska-  
354 Gorzelak B. Fetal programming of the metabolic syndrome. *Taiwanese Journal of Obstetrics  
355 and Gynecology*. 2017;56(2):133-138.
- 356 10. Bertram CE, Hanson MA. Animal models and programming of the metabolic syndrome: Type  
357 2 diabetes. *British medical bulletin*. 2001;60(1):103-121.
- 358 11. George LA, Uthlaut AB, Long NM, et al. Different levels of overnutrition and weight gain during  
359 pregnancy have differential effects on fetal growth and organ development. *Reproductive  
360 Biology and Endocrinology*. 2010;8(1):1-11.
- 361 12. Lawlor DA, Relton C, Sattar N, Nelson SM. Maternal adiposity—a determinant of perinatal and  
362 offspring outcomes? *Nature Reviews Endocrinology*. 2012;8(11):679.
- 363 13. Sharp GC, Lawlor DA, Richardson SS. It's the mother!: How assumptions about the causal  
364 primacy of maternal effects influence research on the developmental origins of health and  
365 disease. *Social Science & Medicine*. 2018;213:20-27.
- 366 14. Richmond RC, Timpson NJ, Felix JF, et al. Using Genetic Variation to Explore the Causal Effect  
367 of Maternal Pregnancy Adiposity on Future Offspring Adiposity: A Mendelian Randomisation  
368 Study. *PLoS medicine*. 2017;14(1):e1002221.
- 369 15. Bond TA, Richmond RC, Karhunen V, et al. Exploring the causal effect of maternal pregnancy  
370 adiposity on offspring adiposity: Mendelian randomization using polygenic risk scores.  
371 *medRxiv*. 2021.
- 372 16. Smith GD, Steer C, Leary S, Ness A. Is there an intrauterine influence on obesity? Evidence  
373 from parent–child associations in the Avon Longitudinal Study of Parents and Children  
374 (ALSPAC). *Archives of disease in childhood*. 2007;92(10):876-880.
- 375 17. Kivimäki M, Lawlor DA, Smith GD, et al. Substantial intergenerational increases in body mass  
376 index are not explained by the fetal overnutrition hypothesis: the Cardiovascular Risk in Young  
377 Finns Study. *The American journal of clinical nutrition*. 2007;86(5):1509-1514.
- 378 18. Han T, Hart C, Haig C, et al. Contributions of maternal and paternal adiposity and smoking to  
379 adult offspring adiposity and cardiovascular risk: the Midspan Family Study. *BMJ open*.  
380 2015;5(11).



- 381 19. Heslehurst N, Vieira R, Akhter Z, et al. The association between maternal body mass index and  
382 child obesity: A systematic review and meta-analysis. *PLoS medicine*. 2019;16(6):e1002817.
- 383 20. Dekkers OM, Vandenbroucke JP, Cevallos M, Renehan AG, Altman DG, Egger M. COSMOS-E:  
384 guidance on conducting systematic reviews and meta-analyses of observational studies of  
385 etiology. *PLoS medicine*. 2019;16(2):e1002742.
- 386 21. Covidence. Covidence systematic review software. Veritas Health Innovation, Melbourne,  
387 Australia. .
- 388 22. Borenstein M, Hedges LV, Higgins JP, Rothstein HR. "CHAPTER 23 Independent Subgroups  
389 within a Study". *Introduction to meta-analysis*. John Wiley & Sons; 2021.
- 390 23. Hu Y, He L, Wu Y, Ma G, Li L, Hu Y. Familial correlation and aggregation of body mass index  
391 and blood pressure in Chinese Han population. *BMC public health*. 2013;13(1):686.
- 392 24. Johnson PC, Logue J, McConnachie A, et al. Intergenerational change and familial aggregation  
393 of body mass index. *Eur J Epidemiol*. 2012;27(1):53-61.
- 394 25. Kvaavik E, Tell GS, Klepp K-I. Predictors and tracking of body mass index from adolescence into  
395 adulthood: follow-up of 18 to 20 years in the Oslo Youth Study. *Archives of pediatrics &  
396 adolescent medicine*. 2003;157(12):1212-1218.
- 397 26. Swanton S, Choh AC, Lee M, et al. Body mass index associations between mother and offspring  
398 from birth to age 18: the Fels Longitudinal Study. *Obesity Science & Practice*. 2017;3(2):127-  
399 133.
- 400 27. Egger M, Smith GD, Phillips AN. Meta-analysis: principles and procedures. *BMJ (Clinical  
401 research ed)*. 1997;315(7121):1533-1537.
- 402 28. Friedlander Y, Kark J, Kaufmann N, Berry E, Stein YI, Joo. Familial aggregation of body mass  
403 index in ethnically diverse families in Jerusalem. The Jerusalem Lipid Research Clinic.  
404 1988;12(3):237-247.
- 405 29. Cho C, Maawadh A, Gerstner GE. Comparisons of chewing rhythm, craniomandibular  
406 morphology, body mass and height between mothers and their biological daughters. *Archives  
407 of Oral Biology*. 2015;60(11):1667-1674.
- 408 30. Salces I, Rebato E, San Martin L, Rosique J, Vinagre A, Susanne C. Family resemblance for  
409 anthropometric traits II. Assessment of maternal occupational and age effects. *Homo*.  
410 2002;52(3):201-213.
- 411 31. Kowaleski-Jones L, Brown BB, Fan JX, Smith KR, Zick CD. Are you what your mother weighs?  
412 Evaluating the impact of maternal weight trajectories on youth overweight. *Maternal and  
413 child health journal*. 2010;14(5):680-686.
- 414 32. Classen TJ. Measures of the intergenerational transmission of body mass index between  
415 mothers and their children in the United States, 1981–2004. *Economics & Human Biology*.  
416 2010;8(1):30-43.
- 417 33. Chaparro MP, Koupil I, Byberg L. Maternal pre-pregnancy BMI and offspring body composition  
418 in young adulthood: the modifying role of offspring sex and birth order. *Public health nutrition*.  
419 2017;20(17):3084-3089.
- 420 34. Khoury P, Morrison JA, Laskarzewski PM, Glueck CJ. Parent-offspring and sibling body mass  
421 index associations during and after sharing of common household environments: the  
422 Princeton School District Family Study. *Metabolism*. 1983;32(1):82-89.
- 423 35. Egger M, Smith GD, Schneider M, Minder C. Bias in meta-analysis detected by a simple,  
424 graphical test. *BMJ (Clinical research ed)*. 1997;315(7109):629-634.
- 425 36. Harris RJ, Deeks JJ, Altman DG, Bradburn MJ, Harbord RM, Sterne JA. Metan: fixed-and  
426 random-effects meta-analysis. *The Stata Journal*. 2008;8(1):3-28.
- 427 37. Vik KL, Romundstad P, Carlslake D, Davey Smith G, Nilsen TI. Comparison of father-offspring  
428 and mother-offspring associations of cardiovascular risk factors: family linkage within the  
429 population-based HUNT Study, Norway. *International journal of epidemiology*.  
430 2014;43(3):760-771.

- 431 38. Murrin CM, Kelly GE, Tremblay RE, Kelleher CC. Body mass index and height over three  
432 generations: evidence from the Lifeways cross-generational cohort study. *BMC public health*.  
433 2012;12(1):81.
- 434 39. Kelly GE, Murrin C, Viljoen K, O'Brien J, Kelleher C. Body mass index is associated with the  
435 maternal lines but height is heritable across family lines in the Lifeways Cross-Generation  
436 Cohort Study. *BMJ open*. 2014;4(12):e005732.
- 437 40. Laitinen J, Power C, Järvelin M-R. Family social class, maternal body mass index, childhood  
438 body mass index, and age at menarche as predictors of adult obesity. *The American journal of*  
439 *clinical nutrition*. 2001;74(3):287-294.
- 440 41. Magnusson P, Rasmussen F. Familial resemblance of body mass index and familial risk of high  
441 and low body mass index. A study of young men in Sweden. *International journal of obesity*.  
442 2002;26(9):1225-1231.
- 443 42. Reynolds R, Osmond C, Phillips D, Godfrey K. Maternal BMI, parity, and pregnancy weight gain:  
444 influences on offspring adiposity in young adulthood. *The Journal of Clinical Endocrinology &*  
445 *Metabolism*. 2010;95(12):5365-5369.
- 446 43. Hochner H, Friedlander Y, Calderon-Margalit R, et al. Associations of maternal prepregnancy  
447 body mass index and gestational weight gain with adult offspring cardiometabolic risk factors:  
448 the Jerusalem Perinatal Family Follow-up Study. *Circulation*. 2012;125(11):1381-1389.
- 449 44. Mirmiran P, Mirbolooki M, Azizi F. Familial clustering of obesity and the role of nutrition:  
450 Tehran Lipid and Glucose Study. *International journal of obesity*. 2002;26(12):1617-1622.
- 451 45. Wu D-M, Hong Y, Sun C-A, Sung P-K, Rao D, Chu N-F. Familial resemblance of adiposity-related  
452 parameters: results from a health check-up population in Taiwan. *European journal of*  
453 *epidemiology*. 2003;18(3):221-226.
- 454 46. Kazumi T, Kawaguchi A, Yoshino G. Associations of middle-aged mother's but not father's body  
455 mass index with 18-year-old son's waist circumferences, birth weight, and serum hepatic  
456 enzyme levels. *Metabolism*. 2005;54(4):466-470.
- 457 47. Zalbahar N, Najman J, McIntrye HD, Mamun A. Parental pre-pregnancy BMI influences on  
458 offspring BMI and waist circumference at 21 years. *Australian and New Zealand journal of*  
459 *public health*. 2016;40(6):572-578.
- 460 48. Carrillo-Larco RM, Bernabé-Ortiz A, Sal y Rosas VG, et al. Parental body mass index and blood  
461 pressure are associated with higher body mass index and blood pressure in their adult  
462 offspring: a cross-sectional study in a resource-limited setting in northern Peru. *Tropical*  
463 *Medicine & International Health*. 2018;23(5):533-540.
- 464 49. Eriksson JG, Sandboge S, Salonen M, Kajantie E, Osmond C. Maternal weight in pregnancy and  
465 offspring body composition in late adulthood: findings from the Helsinki Birth Cohort Study  
466 (HBCS). *Annals of medicine*. 2015;47(2):94-99.
- 467 50. Sørensen T, Holst C, Stunkard AJ, Skovgaard LT, Jørgensen T, et al. Correlations of  
468 body mass index of adult adoptees and their biological and adoptive relatives. 1992;16(3):227-  
469 236.
- 470 51. Lake JK, Power C, Cole TJ. Child to adult body mass index in the 1958 British birth cohort:  
471 associations with parental obesity. *Archives of disease in childhood*. 1997;77(5):376-381.
- 472 52. Burke V, Beilin LJ, Dunbar D. Family lifestyle and parental body mass index as predictors of  
473 body mass index in Australian children: a longitudinal study. *International journal of obesity*.  
474 2001;25(2):147-157.
- 475 53. Williams S. Overweight at age 21: the association with body mass index in childhood and  
476 adolescence and parents' body mass index. A cohort study of New Zealanders born in 1972-  
477 1973. *International journal of obesity*. 2001;25(2):158-163.
- 478 54. Magarey AM, Daniels LA, Boulton TJ, Cockington RA. Predicting obesity in early adulthood  
479 from childhood and parental obesity. *Int J Obes Relat Metab Disord*. 2003;27(4):505-513.
- 480 55. Crossman A, Sullivan DA, Benin M. The family environment and American adolescents' risk of  
481 obesity as young adults. *Social science & medicine*. 2006;63(9):2255-2267.

- 482 56. Naser Al-Isa A, Campbell J, Desapriya E. Factors associated with overweight and obesity among  
483 Kuwaiti men. *Asia Pacific Journal of Public Health*. 2013;25(1):63-73.
- 484 57. Al-Isa AN. Factors associated with overweight and obesity among Kuwaiti college women.  
485 *Nutrition and health*. 1998;12(4):227-233.
- 486 58. Wang H, Wang J, Liu M-M, et al. Epidemiology of general obesity, abdominal obesity and  
487 related risk factors in urban adults from 33 communities of Northeast China: the CHPSNE  
488 study. *BMC public health*. 2012;12(1):967.
- 489 59. Derraik JG, Ahlsson F, Diderholm B, Lundgren M. Obesity rates in two generations of Swedish  
490 women entering pregnancy, and associated obesity risk among adult daughters. *Scientific  
491 reports*. 2015;5:16692.
- 492 60. Alati R, Betts K, Williams G, Najman J, Zalbahar N, Mamun A. Generational increase in obesity  
493 among young women: a prospective analysis of mother–daughter dyads. *International Journal  
494 of Obesity*. 2016;40(1):176-180.
- 495 61. Rath S, Marsh JA, Newnham JP, et al. Parental pre-pregnancy BMI is a dominant early-life risk  
496 factor influencing BMI of offspring in adulthood. *Obesity science & practice*. 2016;2(1):48-57.
- 497 62. Koupil I, Toivanen P. Social and early-life determinants of overweight and obesity in 18-year-  
498 old Swedish men. *International journal of obesity (2005)*. 2008;32(1):73-81.
- 499 63. Stuebe AM, Forman MR, Michels KB. Maternal-recalled gestational weight gain, pre-  
500 pregnancy body mass index, and obesity in the daughter. *International journal of obesity*.  
501 2009;33(7):743-752.
- 502 64. Schoppa I, Lyass A, Heard-Costa N, et al. Association of Maternal Prepregnancy Weight with  
503 Offspring Adiposity Throughout Adulthood over 37 Years of Follow - up. *Obesity*.  
504 2019;27(1):137-144.
- 505 65. Organization WH. Obesity: preventing and managing the global epidemic. 2000.
- 506 66. Reynolds RM, Osmond C, Phillips DI, Godfrey KM. Maternal BMI, parity, and pregnancy weight  
507 gain: influences on offspring adiposity in young adulthood. *The Journal of clinical  
508 endocrinology and metabolism*. 2010;95(12):5365-5369.
- 509 67. Subramanian S, Ackerson LK, Smith GD. Parental BMI and childhood undernutrition in India:  
510 an assessment of intrauterine influence. *Pediatrics*. 2010;126(3):e663-e671.
- 511 68. Fleten C, Nystad W, Stigum H, et al. Parent-offspring body mass index associations in the  
512 Norwegian Mother and Child Cohort Study: a family-based approach to studying the role of  
513 the intrauterine environment in childhood adiposity. *Am J Epidemiol*. 2012;176(2):83-92.
- 514 69. Corsi DJ, Subramanian S, Ackerson LK, Smith GD. Is there a greater maternal than paternal  
515 influence on offspring adiposity in India? *Archives of disease in childhood*. 2015;100(10):973-  
516 979.
- 517 70. Grant JF, Chittleborough CR, Taylor AW. Parental midlife body shape and association with  
518 multiple adult offspring obesity measures: North West Adelaide Health Study. *PloS one*.  
519 2015;10(9):e0137534.
- 520 71. Perez-Pastor EM, Metcalf BS, Hosking J, Jeffery AN, Voss LD, Wilkin TJ. Assortative weight gain  
521 in mother–daughter and father–son pairs: an emerging source of childhood obesity.  
522 Longitudinal study of trios (EarlyBird 43). *International journal of obesity*. 2009;33(7):727-735.
- 523 72. Næss M, Sund ER, Vie GÅ, et al. Intergenerational polygenic obesity risk throughout  
524 adolescence in a cross - sectional study design: The HUNT study, Norway. *Obesity*.  
525 2021;29(11):1916-1924.
- 526 73. Kaseva N, Väärasmäki M, Matinolli H, et al. Pre-pregnancy overweight or obesity and  
527 gestational diabetes as predictors of body composition in offspring twenty years later:  
528 evidence from two birth cohort studies. *International Journal of Obesity*. 2018;42(4):872-879.
- 529 74. Kazumi T, Kawaguchi A, Yoshino G. Associations of middle-aged mother's but not father's body  
530 mass index with 18-year-old son's waist circumferences, birth weight, and serum hepatic  
531 enzyme levels. *Metabolism*. 2005;54(4):466-470.

532 75. Bond TA, Richmond RC, Karhunen V, et al. Exploring the causal effect of maternal pregnancy  
533 adiposity on offspring adiposity: Mendelian randomisation using polygenic risk scores. *BMC*  
534 *medicine*. 2022;20(1):1-16.

535

536

537 Figures

538

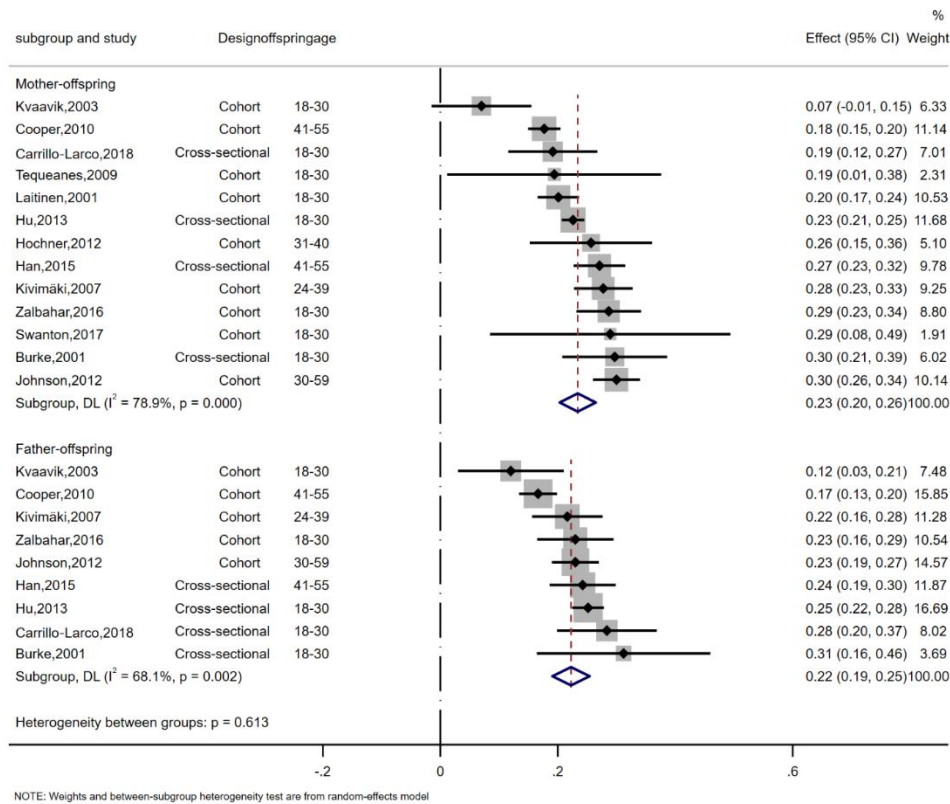

539

540 Figure 1. Meta-analysis of the association between parent and offspring BMI (standardized  
541 mean difference)

542

543 The effect size estimate is the standardized mean difference with 95% confidence intervals (per SD of parental  
544 BMI)

545 The size of the squares estimates is proportional to the weight assigned to each study. Diamonds represent  
546 pooled estimates from a random effects meta-analysis. The  $I^2$  and  $P$  values for heterogeneity are shown.

547 BMI, body mass index; CI, confidence interval

548

549

550

551

552

553

554

555

556

557

558

559

560

561

562

563

564

565

566  
567

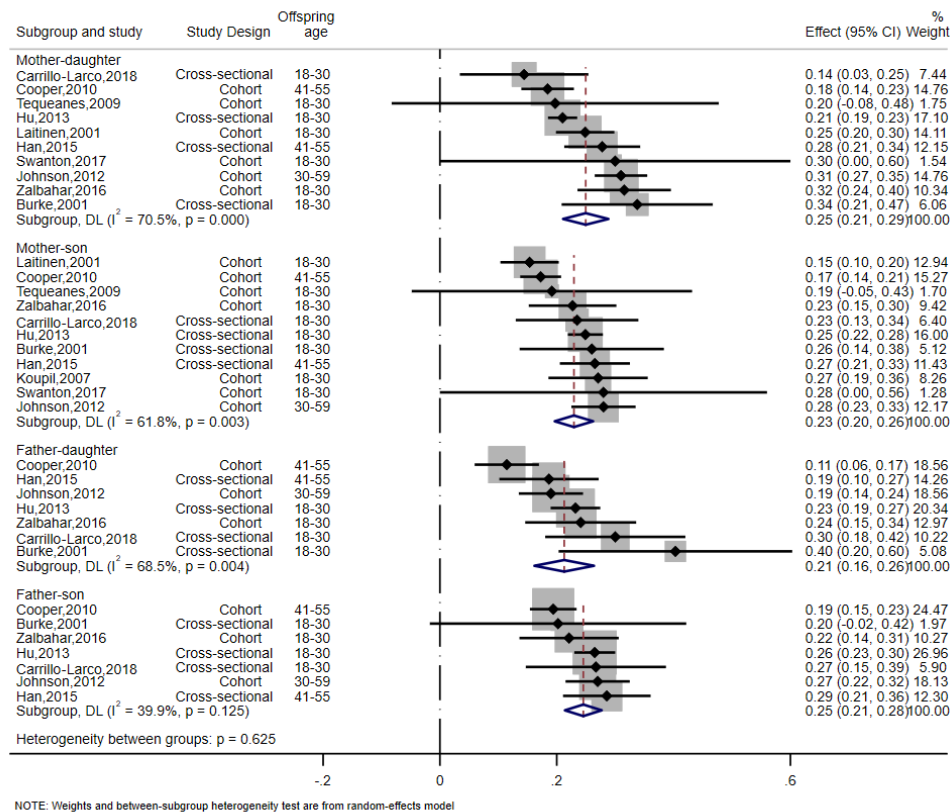

568  
569  
570  
571  
572  
573  
574  
575  
576  
577  
578  
579  
580  
581  
582  
583  
584  
585  
586  
587  
588  
589  
590  
591  
592  
593  
594  
595  
596

Figure 2. Meta-analysis of the association between parent and offspring BMI at sex-specific level (standardized mean difference)

The effect size estimate is the standardized mean difference with 95% confidence intervals (per SD of parental BMI)

The size of the squares estimates is proportional to the weight assigned to each study. Diamonds represent pooled estimates from a random effects meta-analysis. The  $I^2$  and  $P$  values for heterogeneity are shown. BMI, body mass index; CI, confidence interval



597

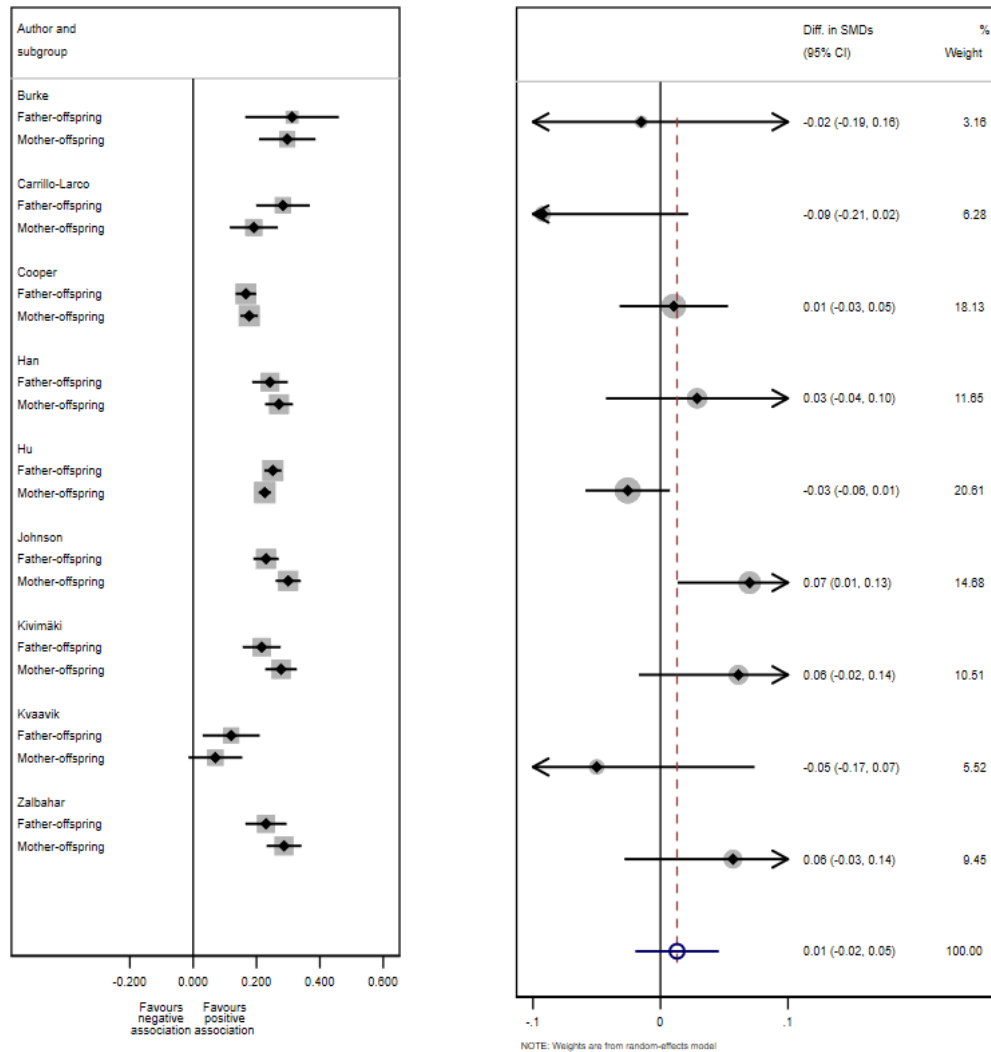

598

599

600

601

Figure 3. Difference in standardized mean difference between mother-offspring and father-offspring BMI associations

602

603

Left plot: SMD (95% CI) in each subgroup of each study. Right plot: Difference of SMD comparing effects for mother-offspring and father-offspring in each study with a fixed-effect meta-analysis of these differences of SMD. The size of the squares and circles is proportional to the weight assigned to each study. Open circles represent pooled estimates.

604

605

606

607

608

SMD, Standardized mean difference; CI, confidence interval

609
